# Supplementary material for: Survey Protocols, Response Rates, and Representation of Underserved Patients: A Randomized Clinical Trial
Source: PubMed Central journal article supplement (PMC10799262; doi:10.1001/jamahealthforum.2023.4929), 2024-01-19
Supplement: jamahealthforum-e234929-s001.pdf [file jamahealthforum-e234929-s001.pdf]

## Supplemental Online Content

Elliott MN, Brown JA, Hambarsoomian K, et al. Survey protocols, response rates, and representation of underserved patients. *JAMA Health Forum*. Published online January 19, 2024. doi:10.1001/jamahealthforum.2023.4929

**eMethods.** Hospital Recruitment Strategy for the HCAHPS Mode Experiment and Sample Size Determination

**eFigure.** Participant Flow for HCAHPS Mode Experiment

**eTable 1.** Characteristics of the Hospitals, Sampled Eligible Patients, and Respondents

**eTable 2.** Patient Characteristics of the Hospitals by Survey Administration Protocol, 46 Mode Experiment Hospitals

**eTable 3.** Response Rates by Completion Mode and Survey Administration Protocol

**eTable 4.** Standardized Response Rates by Mode and Age Group

**eTable 5.** Standardized Response Rate by Mode and Service Line/Sex

**eTable 6.** Yield and Increase in Yield Compared to Mail Only, by Age Group

**eTable 7.** Yield and Increase in Yield Compared to Mail Only, by Service Line and Sex

**eTable 8.** Characteristics of Early (0-42 days to survey completion) to Late (43-49 days to completion) Respondents

This supplemental material has been provided by the authors to give readers additional information about their work.

## **eMethods. Hospital Recruitment Strategy for the HCAHPS Mode Experiment and Sample Size Determination**

Hospitals were sampled and enrolled in a three-stage process: In Stage 1, hospitals were randomly sampled within 12 strata. In Stage 2 (September 22, 2020- March 26, 2021), hospitals were contacted by mail and phone to confirm willingness to participate. In stage 3 (December 14, 2020- May 3, 2021), detailed questions about participation and data needs were addressed, and data use agreements were executed. We began with all hospitals that collected HCAHPS data in 2019 and have data reported on the CMS Hospital Compare Web site (now Care Compare). We then restricted to hospitals with sufficient HCAHPS-eligible discharges in 2019 to ensure that the hospitals would meet the minimum sample size requirements required for the mode experiment design after being able to collect at least 100 annual completed surveys for regular HCAHPS implementation. HVBP requires 100 annual completes, which corresponds to 50 completes over the 6 planned months of the mode experiment. A hospital was eligible if 75% of its remaining number of eligible surveys in 2019 was at least 535, after allocating enough surveys to obtain 50 completed surveys at its observed 2019 RR.

The 1,645 eligible hospitals, with 9,277,520 discharges (representing 81.8% of all eligible discharges) were classified into 12 strata using characteristics available in the American Hospital Association database, based on the factorial combinations of three characteristics: hospital bed size (< or =200 beds, >200 beds), HCAHPS HVBP score (below median, above median), and geographic region (Northeast, South, Midwest/West). Half of the hospitals were randomly sampled within each queue. Of the 823 hospitals, 170 hospitals (21%) agreed to participate in Stage 2. After learning more about the sampling and data requirements of the mode experiment, 88 hospitals (52% of 170, 11% of 823) agreed to review the data use agreement (DUA) necessary for sharing discharge data, and 46 hospitals (52% of 88, 27% of 170, 6% of 823) executed a DUA.

This design was expected to result in ~1,000 completes in each of the 12 combinations of 6 survey protocol arms and 2 email availability strata. under the anticipated response rates. For this design, an overall sample size of 41,714 eligible hospital patients were to be sampled over a six-month period; this sample size was obtained dividing 1000 by the projected response rate in each of the 12 design cells. Anticipated response rates were informed by the research literature, An overall 3% post-sampling ineligible rate was also assumed. See Participant Flow diagram below.

**eFigure. Participant Flow for HCAHPS Mode Experiment**

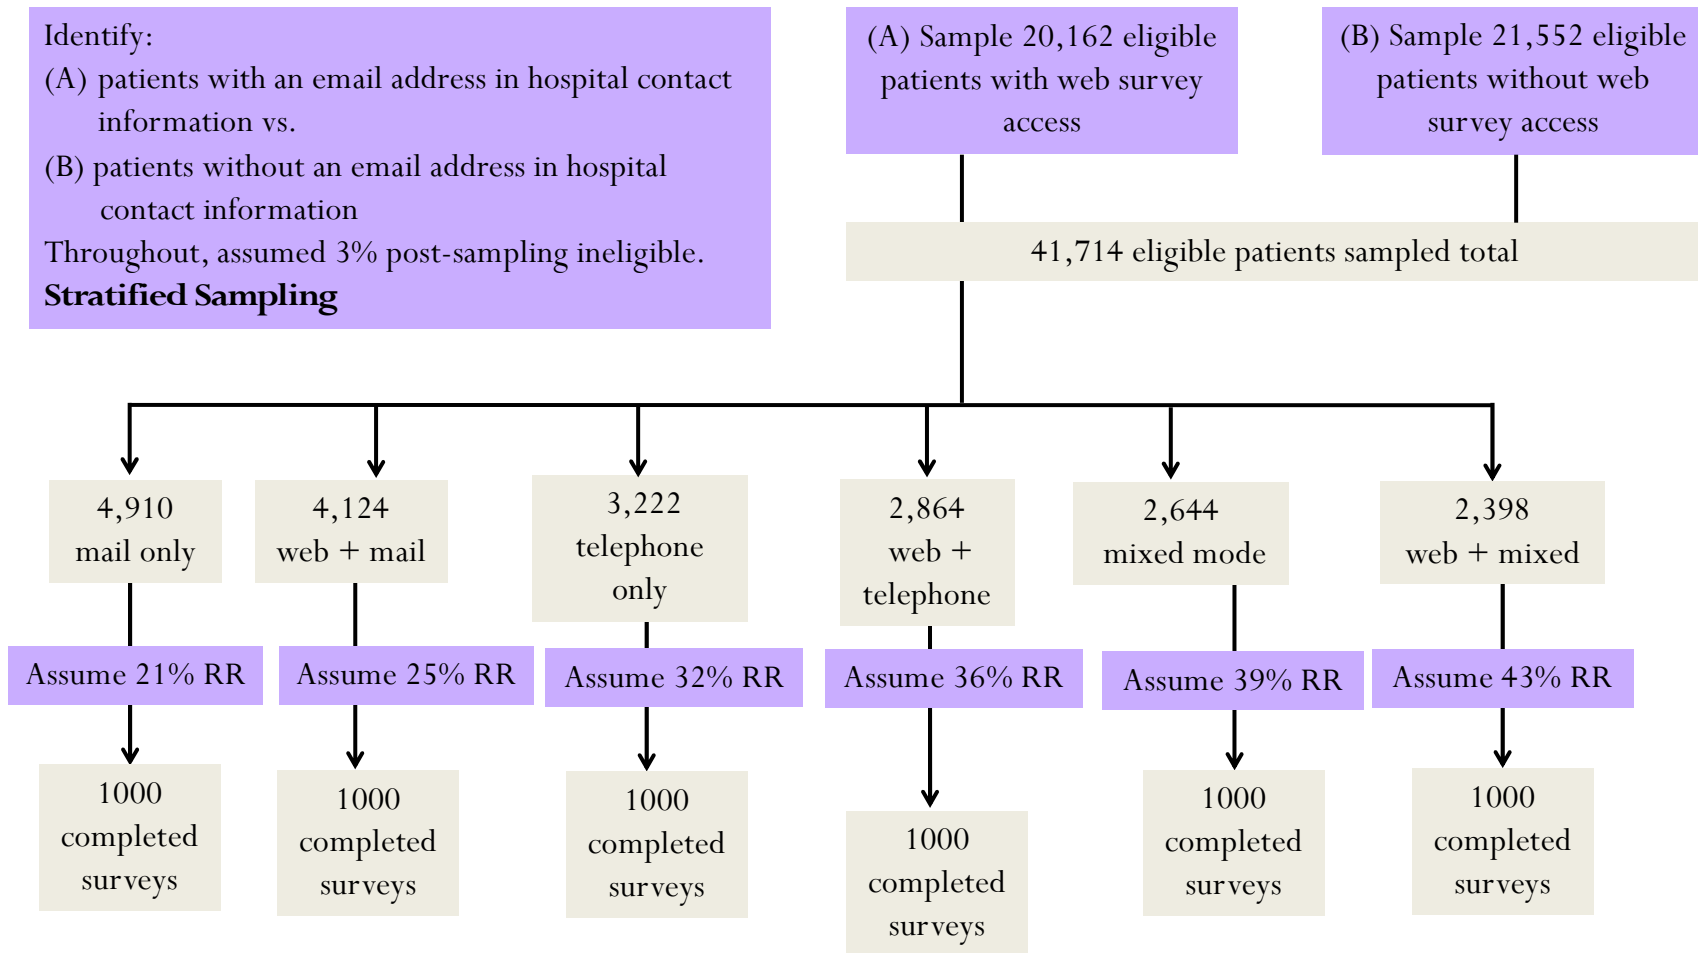

**Participant Flow for HCAHPS Mode Experiment**

(cont.)

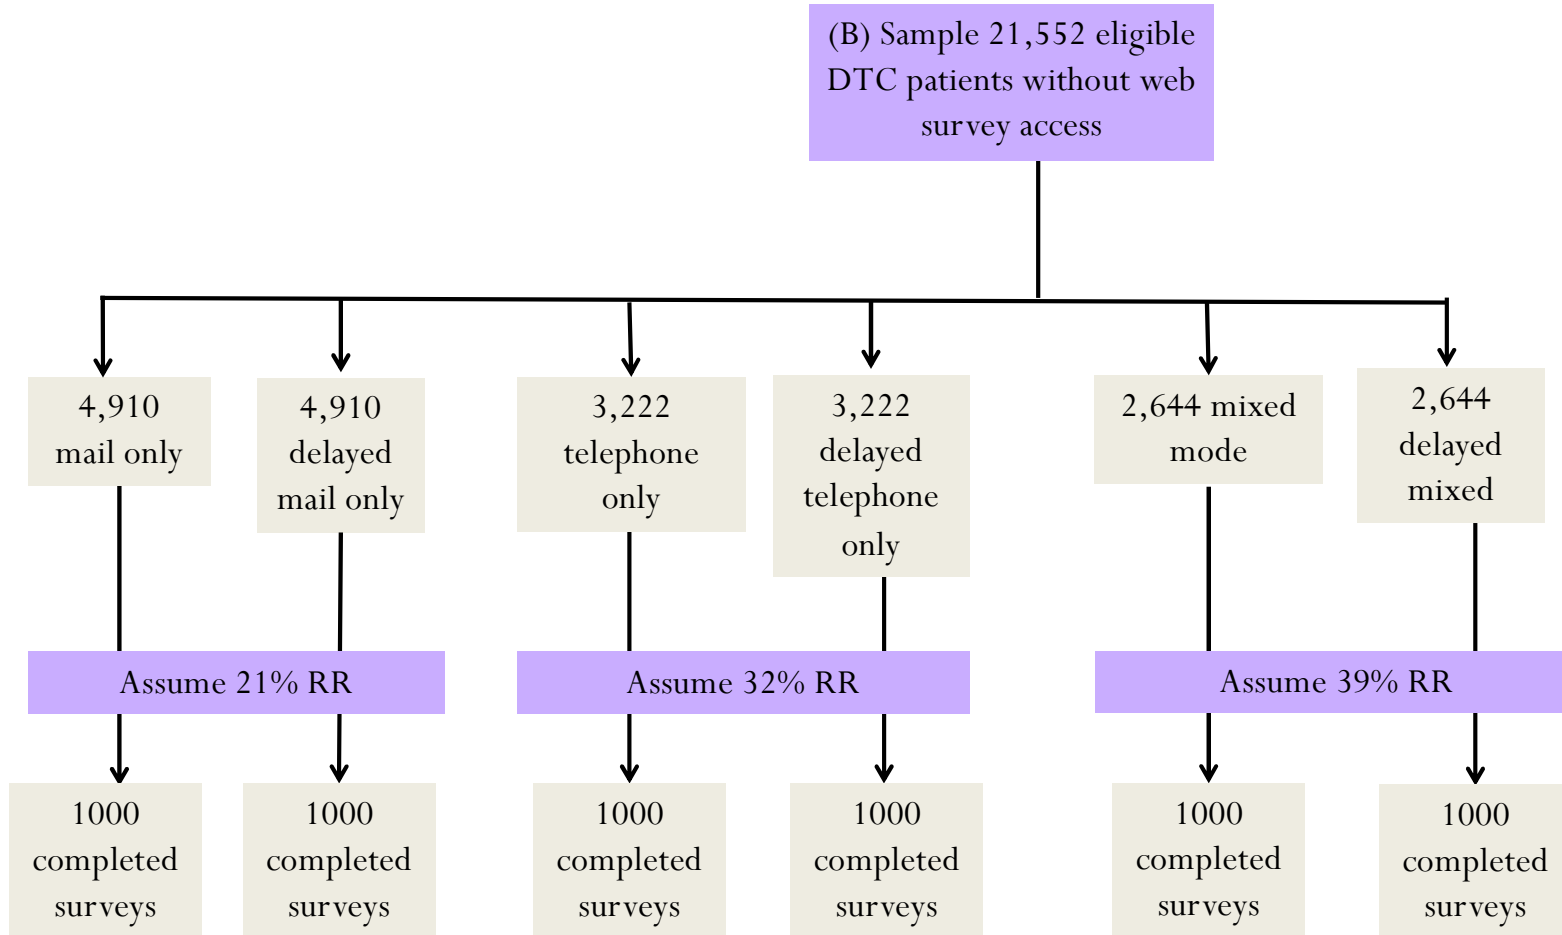

**eTable 1. Characteristics of the Hospitals, Sampled Eligible Patients, and Respondents**

| <b>Characteristic</b>     | <b>Mode experiment hospitals</b> | <b>2021 HCAHPS implementation hospitals</b> |
|---------------------------|----------------------------------|---------------------------------------------|
| Hospitals                 | n = 46                           | n = 4556                                    |
| Bed size                  |                                  |                                             |
| <100                      | 2.2%                             | 51.6%                                       |
| 100 to 199                | 6.5%                             | 19.3%                                       |
| 200 or more               | 91.3%                            | 28.1%                                       |
| Ownership                 |                                  |                                             |
| Profit                    | 26.1%                            | 16.0%                                       |
| Government/non-profit     | 73.9%                            | 82.9%                                       |
| Census regions            |                                  |                                             |
| Midwest                   | 17.4%                            | 29.7%                                       |
| Northeast                 | 10.9%                            | 27.6%                                       |
| South                     | 45.7%                            | 22.6%                                       |
| West                      | 26.1%                            | 20.1%                                       |
| HCAHPS HVBP <sup>a</sup>  |                                  |                                             |
| Above median              | 52.2%                            | 50.0%                                       |
| Below median              | 47.8%                            | 50.0%                                       |
| Sampled eligible patients | n = 34 335                       | n = 11 348 151                              |
| Age                       |                                  |                                             |
| 18-24                     | 5.4%                             | 5.9%                                        |
| 25-34                     | 16.7%                            | 14.9%                                       |
| 35-44                     | 12.6%                            | 10.9%                                       |
| 45-54                     | 10.6%                            | 11.2%                                       |
| 55-64                     | 16.6%                            | 17.5%                                       |
| 65-74                     | 18.3%                            | 19.1%                                       |
| 75-84                     | 13.5%                            | 13.9%                                       |
| ≥85                       | 6.4%                             | 6.6%                                        |
| Service line × sex        |                                  |                                             |
| Maternity                 | 19.2%                            | 16.0%                                       |
| Female medical            | 28.3%                            | 30.4%                                       |
| Male medical              | 26.9%                            | 29.1%                                       |
| Female surgical           | 12.5%                            | 12.2%                                       |
| Male surgical             | 13.2%                            | 12.3%                                       |
| Respondents               | n = 9642                         | n = 2 301 815 <sup>1</sup>                  |
| Race and ethnicity        |                                  |                                             |
| AA&NHPI <sup>b</sup>      | 6.9%                             | 3.1%                                        |
| AI/AN <sup>c</sup>        | 0.7%                             | 0.7%                                        |
| Black                     | 11.5%                            | 8.3%                                        |
| Hispanic                  | 17.4%                            | 10.5%                                       |
| White                     | 61.0%                            | 75.5%                                       |
| Multiracial               | 2.6%                             | 2.0%                                        |

<sup>a</sup>Hospital Value-Based Purchasing.

<sup>b</sup>Asian American and Native Hawaii/Pacific Islander.

<sup>c</sup>American Indian and Alaska Native.

Percentages are reported excluding missing values from the denominator of ratio.

In the 2021 Mode Experiment Study, 19.0% (n = 6536) of the sampled eligible patients were missing service line and 3.5% (n = 339) of respondents were missing race-and-ethnicity.

In the 2021 Implementation Data, 5.4% (n = 124 298) of respondents from all hospitals were missing race-and-ethnicity.

HCAHPS HVBP scores are based on the 2927 hospitals for which an HVBP was calculated (including all 46 mode experiment hospitals).

**eTable 2. Patient Characteristics of the Hospitals by Survey Administration Protocol, 46 Mode Experiment Hospitals**

|                                             | <b>Mail-<br/>Only</b> | <b>Phone-<br/>Only</b> | <b>Mail-<br/>Phone</b> | <b>Web-<br/>Mail</b> | <b>Web-<br/>Phone</b> | <b>Web-<br/>Mail-<br/>Phone</b> |
|---------------------------------------------|-----------------------|------------------------|------------------------|----------------------|-----------------------|---------------------------------|
| <b>Sampled eligible patients (n=34,335)</b> |                       |                        |                        |                      |                       |                                 |
| Age                                         |                       |                        |                        |                      |                       |                                 |
| 18-24                                       | 5.1%                  | 5.4%                   | 5.2%                   | 5.4%                 | 5.5%                  | 5.9%                            |
| 25-34                                       | 15.9%                 | 17.1%                  | 17.4%                  | 15.9%                | 17.0%                 | 17.4%                           |
| 35-44                                       | 12.7%                 | 12.8%                  | 12.8%                  | 12.0%                | 13.1%                 | 12.2%                           |
| 45-54                                       | 10.6%                 | 10.9%                  | 10.5%                  | 10.9%                | 10.2%                 | 10.5%                           |
| 55-64                                       | 17.0%                 | 16.6%                  | 16.6%                  | 16.3%                | 16.9%                 | 16.1%                           |
| 65-74                                       | 18.2%                 | 18.0%                  | 18.1%                  | 19.2%                | 18.0%                 | 17.8%                           |
| 75-84                                       | 13.6%                 | 13.2%                  | 13.2%                  | 13.7%                | 13.6%                 | 13.7%                           |
| 85+                                         | 7.0%                  | 6.0%                   | 6.3%                   | 6.6%                 | 5.8%                  | 6.4%                            |
| Service line x Sex                          |                       |                        |                        |                      |                       |                                 |
| Maternity                                   | 18.5%                 | 19.7%                  | 20.0%                  | 18.5%                | 19.1%                 | 19.9%                           |
| Female Medical                              | 29.1%                 | 27.9%                  | 28.2%                  | 27.8%                | 28.4%                 | 28.4%                           |
| Male Medical                                | 27.1%                 | 26.8%                  | 26.1%                  | 27.0%                | 26.6%                 | 27.5%                           |
| Female Surgical                             | 12.8%                 | 12.4%                  | 12.8%                  | 12.7%                | 12.3%                 | 11.8%                           |
| Male Surgical                               | 12.6%                 | 13.2%                  | 12.9%                  | 14.1%                | 13.6%                 | 12.4%                           |
| <b>Respondents (n=9,642)</b>                |                       |                        |                        |                      |                       |                                 |
| Race-and-ethnicity                          |                       |                        |                        |                      |                       |                                 |
| AA&NHPI <sup>a</sup>                        | 5.8%                  | 6.4%                   | 7.9%                   | 8.0%                 | 6.8%                  | 6.2%                            |
| AI/AN <sup>b</sup>                          | 0.8%                  | 0.4%                   | 0.9%                   | 0.6%                 | 0.8%                  | 0.7%                            |
| Black                                       | 10.7%                 | 14.1%                  | 11.3%                  | 9.6%                 | 11.4%                 | 12.9%                           |
| Hispanic                                    | 13.6%                 | 20.8%                  | 16.1%                  | 16.8%                | 20.2%                 | 17.5%                           |
| White                                       | 68.6%                 | 52.7%                  | 60.5%                  | 63.8%                | 56.8%                 | 61.0%                           |
| Multiracial                                 | 0.7%                  | 5.6%                   | 3.3%                   | 1.2%                 | 4.0%                  | 1.7%                            |

<sup>a</sup>Asian American and Native Hawaii/Pacific Islander

<sup>b</sup>American Indian and Alaska Native

**eTable 3. Response Rates by Completion Mode and Survey Administration Protocol**

| Survey Administration Protocol | Completion Mode | Pooled | EMA   | No EMA |
|--------------------------------|-----------------|--------|-------|--------|
| Mail-Only                      | Mail            | 22.8%  | 23.7% | 21.2%  |
| Phone-Only                     | Phone           | 22.1%  | 23.1% | 20.3%  |
| Mail-Phone                     | Mail            | 17.7%  | 19.1% | 15.3%  |
|                                | Phone           | 13.5%  | 15.0% | 10.8%  |
| Web-Mail                       | Web             | 12.6%  | 19.9% | N/A    |
|                                | Mail            | 16.1%  | 13.6% | 20.3%  |
| Web-Phone                      | Web             | 13.0%  | 20.3% | N/A    |
|                                | Phone           | 17.5%  | 16.8% | 18.7%  |
| Web-Mail-Phone                 | Web             | 10.1%  | 15.7% | N/A    |
|                                | Mail            | 13.1%  | 11.5% | 16.0%  |
|                                | Phone           | 13.0%  | 12.8% | 13.3%  |



**eTable 4. Standardized Response Rates by Mode and Age Group**

| Age          | Mail-Only (ref)         | Phone-Only               | Mail-Phone               | Web-Mail                       | Web-Phone                       | Web-Mail-Phone                  |
|--------------|-------------------------|--------------------------|--------------------------|--------------------------------|---------------------------------|---------------------------------|
| <b>18-24</b> | 8.5%<br>(5.6%, 11.5%)   | 19.6%*<br>(15.0%, 24.1%) | 20.8%*<br>(15.7%, 25.9%) | 11.0%<br>(7.8%, 14.2%)         | <b>26.8%*</b><br>(21.8%, 31.8%) | 21.1%*<br>(16.3%, 25.9%)        |
| <b>25-34</b> | 10.0%<br>(8.2%, 11.8%)  | 17.4%*<br>(15.0%, 19.8%) | 23.2%*<br>(20.2%, 26.1%) | 23.7%*<br>(21.1%, 26.2%)       | 27.4%*<br>(24.5%, 30.2%)        | <b>30.2%*</b><br>(27.1%, 33.3%) |
| <b>35-44</b> | 13.9%<br>(11.6%, 16.2%) | 20.8%*<br>(17.8%, 23.8%) | 25.5%*<br>(22%, 29%)     | 21.1%*<br>(18.3%, 24%)         | 27.0%*<br>(23.8%, 30.3%)        | <b>28.5%*</b><br>(24.8%, 32.2%) |
| <b>45-54</b> | 16.3%<br>(13.6%, 19.1%) | 22.5%*<br>(19.2%, 25.8%) | 22.3%*<br>(18.6%, 26%)   | 20.0%<br>(17.0%, 22.9%)        | 28.4%*<br>(24.7%, 32.1%)        | <b>31.9%*</b><br>(27.7%, 36.1%) |
| <b>55-64</b> | 23.8%<br>(21.2%, 26.3%) | 22.9%<br>(20.2%, 25.6%)  | 32.2%*<br>(28.9%, 35.4%) | 29.7%*<br>(27.0%, 32.5%)       | 32.6%*<br>(29.5%, 35.6%)        | <b>39.5%*</b><br>(36%, 43%)     |
| <b>65-74</b> | 37.4%<br>(34.6%, 40.2%) | 25.7%*<br>(23.0%, 28.4%) | 39.0%<br>(35.7%, 42.3%)  | 41.7%*<br>(38.8%, 44.5%)       | 32.4%*<br>(29.5%, 35.2%)        | <b>43.7%*</b><br>(40.3%, 47%)   |
| <b>75-84</b> | 40.4%<br>(37.1%, 43.8%) | 25.4%*<br>(22.3%, 28.5%) | 43.6%<br>(39.7%, 47.6%)  | 46.0%*<br>(42.6%, 49.5%)       | 35.3%<br>(31.9%, 38.7%)         | <b>47.2%*</b><br>(43.2%, 51.2%) |
| <b>85+</b>   | 40.8%<br>(35.7%, 45.8%) | 19.7%*<br>(15.4%, 24%)   | 36.4%<br>(30.9%, 41.9%)  | <b>41.0%</b><br>(35.8%, 46.2%) | 27.9%*<br>(23.2%, 32.6%)        | 40.5%<br>(34.8%, 46.2%)         |

\* $p < 0.05$  for difference from Mail-Only via logistic regression. Confidence intervals are based on a normal approximation of the binomial.

**Bold** is highest response rate for a given row.

**eTable 5. Standardized Response Rate by Mode and Service Line/Sex**

|                             | Mail-Only<br>(ref)         | Phone-<br>Only              | Mail-<br>Phone              | Web-Mail                    | Web-Phone                          | Web-Mail-<br>Phone                 |
|-----------------------------|----------------------------|-----------------------------|-----------------------------|-----------------------------|------------------------------------|------------------------------------|
| <b>Maternity</b>            | 12.3%<br>(10.3%,<br>14.4%) | 18.6%*<br>(16%,<br>21.2%)   | 26.8%*<br>(23.7%,<br>30.0%) | 28.1%*<br>(25.3%,<br>30.9%) | <b>32.2%*</b><br>(29.1%,<br>35.3%) | <b>32.2%*</b><br>(28.9%,<br>35.6%) |
| <b>Female,<br/>Medical</b>  | 24.5%<br>(22.3%,<br>26.7%) | 19.4%*<br>(17.2%,<br>21.5%) | 29.7%*<br>(27.0%,<br>32.5%) | 27.9%<br>(25.6%,<br>30.3%)  | 26.8%<br>(24.4%,<br>29.2%)         | <b>37.7%*</b><br>(34.7%,<br>40.6%) |
| <b>Male,<br/>Medical</b>    | 23.7%<br>(21.5%,<br>26.0%) | 22.0%<br>(19.6%,<br>24.3%)  | 28.7%*<br>(25.9%,<br>31.5%) | 27.8%*<br>(25.4%,<br>30.2%) | 27.6%*<br>(25.1%,<br>30.1%)        | <b>33.9%*</b><br>(31%, 36.8%)      |
| <b>Female,<br/>Surgical</b> | 35.0%<br>(31.4%,<br>38.7%) | 28.7%*<br>(25.0%,<br>32.5%) | 41.2%<br>(36.7%,<br>45.6%)  | 41.9%*<br>(38.2%,<br>45.7%) | 36.6%<br>(32.6%,<br>40.6%)         | <b>43.2%</b><br>(38.6%,<br>47.8%)  |
| <b>Male,<br/>Surgical</b>   | 31.1%<br>(27.5%,<br>34.6%) | 27.2%<br>(23.6%,<br>30.8%)  | 37.7%*<br>(33.4%,<br>42.1%) | 35.9%*<br>(32.4%,<br>39.4%) | 33.7%<br>(29.9%,<br>37.4%)         | <b>41.3%*</b><br>(36.8%,<br>45.7%) |

\* $p < 0.05$  for difference from Mail-Only via logistic regression. Confidence intervals are based on a normal approximation of the binomial.

**Bold** is highest response rate for a given row.

**eTable 6. Yield and Increase in Yield Compared to Mail Only, by Age Group**

| Age          | Yield                    | Percentage Increase in Yield Compared to Mail-Only<br>(95% Confidence Interval) Mail-Only |                        |                           |                              |                               |
|--------------|--------------------------|-------------------------------------------------------------------------------------------|------------------------|---------------------------|------------------------------|-------------------------------|
|              | Mail-Only<br>(ref)       | Phone-Only                                                                                | Mail-Phone             | Web-Mail                  | Web-Phone                    | Web-Mail-<br>Phone            |
| <b>18-24</b> | 0.4<br>(0.3, 0.5)        | +150%*<br>(87%, 213%)                                                                     | +150%*<br>(81%, 219%)  | +50%<br>(5%, 95%)         | <b>250%*</b><br>(176%, 324%) | +200%*<br>(125%, 275%)        |
| <b>25-34</b> | 1.5<br>(1.2, 1.8)        | +87%*<br>(59%, 115%)                                                                      | +147%*<br>(112%, 182%) | +140%*<br>(111%, 169%)    | +187%*<br>(152%, 221%)       | <b>+233%*</b><br>(193%, 274%) |
| <b>35-44</b> | 1.7<br>(1.4, 2.0)        | +47%*<br>(24%, 70%)                                                                       | +82%*<br>(54%, 111%)   | +41%*<br>(20%, 62%)       | <b>+94%*</b><br>(68%, 121%)  | <b>+94%*</b><br>(65%, 123%)   |
| <b>45-54</b> | 1.6<br>(1.3, 1.9)        | +44%*<br>(20%, 67%)                                                                       | +38%*<br>(12%, 63%)    | +25%<br>(5%, 45%)         | +69%*<br>(43%, 94%)          | <b>+94%*</b><br>(64%, 124%)   |
| <b>55-64</b> | 3.8<br>(3.4, 4.2)        | -5%<br>(-18%, 7%)                                                                         | +32%*<br>(16%, 47%)    | +18%*<br>(6%, 31%)        | +34%*<br>(20%, 49%)          | <b>+55%*</b><br>(38%, 72%)    |
| <b>65-74</b> | 6.3<br>(5.7, 6.9)        | -32%*<br>(-40%, -24%)                                                                     | +3%<br>(-8%, 14%)      | <b>+17%*</b><br>(8%, 27%) | -14%*<br>(-23%, -5%)         | +16%*<br>(4%, 27%)            |
| <b>75-84</b> | 4.9<br>(4.4, 5.4)        | -35%*<br>(-44%, -26%)                                                                     | +10%<br>(-3%, 23%)     | +16%*<br>(5%, 27%)        | -8%<br>(-19%, 3%)            | <b>+20%*</b><br>(7%, 34%)     |
| <b>85+</b>   | <b>2.4</b><br>(2.0, 2.8) | -54%*<br>(-65%, -43%)                                                                     | -13%<br>(-29%, 4%)     | -8%<br>(-23%, 6%)         | -33%*<br>(-47%, -20%)        | <b>0%</b><br>(-18%, 18%)      |

\* $p < 0.05$  for difference from Mail-Only via logistic regression. Confidence intervals are based on a normal approximation of the binomial.

**Bold** is highest response rate for a given row.

Yield is the ratio of number of completes by mode and age divided by the number fielded within a protocol

**eTable 7. Yield and Increase in Yield Compared to Mail Only, by Service Line and Sex**

|                         | Yield              | Percentage Increase in Yield Compared to Mail-Only<br>(95% Confidence Interval) Mail-Only |                       |                           |                        |                               |
|-------------------------|--------------------|-------------------------------------------------------------------------------------------|-----------------------|---------------------------|------------------------|-------------------------------|
|                         |                    | Phone-Only                                                                                | Mail-Phone            | Web-Mail                  | Web-Phone              | Web-Mail-Phone                |
|                         | Mail-Only<br>(ref) |                                                                                           |                       |                           |                        |                               |
| <b>Maternity</b>        | 1.8<br>(1.5, 2.1)  | +50%*<br>(27%, 73%)                                                                       | +122%*<br>(92%, 152%) | +128%*<br>(102%, 154%)    | +161%*<br>(131%, 191%) | <b>+172%*</b><br>(139%, 205%) |
| <b>Medical, female</b>  | 5.3<br>(4.8, 5.8)  | -23%*<br>(-32%, -13%)                                                                     | +17%*<br>(4%, 30%)    | +8%<br>(-3%, 18%)         | +9%<br>(-2%, 21%)      | <b>+51%*</b><br>(37%, 65%)    |
| <b>Medical, male</b>    | 4.8<br>(4.3, 5.3)  | -8%<br>(-19%, 2%)                                                                         | +19%*<br>(5%, 32%)    | +17%*<br>(5%, 28%)        | +15%*<br>(3%, 27%)     | <b>+44%*</b><br>(29%, 58%)    |
| <b>Surgical, female</b> | 3.4<br>(3.0, 3.8)  | <b>-21%*</b><br>(-33%, -9%)                                                               | +15%<br>(-1%, 30%)    | <b>+21%*</b><br>(7%, 34%) | +0%<br>(-13%, 13%)     | +15%<br>(-1%, 30%)            |
| <b>Surgical, male</b>   | 3.0<br>(2.6, 3.4)  | -10%<br>(-24%, 4%)                                                                        | +20%*<br>(3%, 37%)    | +27%*<br>(12%, 42%)       | +13%<br>(-2%, 29%)     | <b>+30%*</b><br>(12%, 48%)    |

\* $p < 0.05$  for difference from Mail-Only via logistic regression. Confidence intervals are based on a normal approximation of the binomial.

**Bold** is highest response rate for a given row.

**eTable 8. Characteristics of Early (0-42 days to survey completion) to Late (43-49 days to completion) Respondents**

|                         | Percentage       |                  |              | Test<br>(Early vs Late) |
|-------------------------|------------------|------------------|--------------|-------------------------|
|                         | Early            | Late             | Late - Early | p-value                 |
|                         | n=8,392<br>(87%) | n=1,250<br>(13%) |              |                         |
| Sex                     |                  |                  |              |                         |
| Female                  | 59%              | 60%              | 1%           | 0.40                    |
| Age                     |                  |                  |              |                         |
| 18-24                   | 3%               | 3%               | 0%           | 0.99                    |
| 25-34                   | 12%              | 14%              | 2%           | 0.04                    |
| 35-44                   | 10%              | 10%              | 0%           | 0.59                    |
| 45-54                   | 9%               | 8%               | 0%           | 0.83                    |
| 55-64                   | 17%              | 19%              | 2%           | 0.07                    |
| 65-74                   | 23%              | 21%              | -2%          | 0.14                    |
| 75-84                   | 19%              | 16%              | -3%          | 0.03                    |
| 85+                     | 7%               | 7%               | 0%           | 0.97                    |
| Language Spoken at Home |                  |                  |              |                         |
| English                 | 90%              | 87%              | -4%          | 0.000                   |
| Spanish                 | 5%               | 7%               | 2%           | 0.01                    |
| Chinese                 | 1%               | 1%               | 0%           | 0.25                    |
| Other                   | 4%               | 6%               | 2%           | 0.005                   |
| Education               |                  |                  |              |                         |
| 8th grade               | 3%               | 4%               | 1%           | 0.01                    |
| Some high school        | 6%               | 8%               | 1%           | 0.09                    |
| High school             | 27%              | 28%              | 2%           | 0.19                    |
| Some college            | 31%              | 32%              | 1%           | 0.56                    |
| 4-year college degree   | 16%              | 13%              | -3%          | 0.005                   |

|                                                      |     |     |      |       |
|------------------------------------------------------|-----|-----|------|-------|
| More college                                         | 17% | 15% | -2%  | 0.08  |
| Sex x Service line                                   |     |     |      |       |
| Female medical                                       | 27% | 29% | 2%   | 0.08  |
| Female surgical                                      | 17% | 15% | -2%  | 0.07  |
| Maternity                                            | 16% | 17% | 1%   | 0.19  |
| Male medical                                         | 25% | 24% | -1%  | 0.44  |
| Male surgical                                        | 16% | 15% | -1%  | 0.45  |
| Overall Health                                       |     |     |      |       |
| Excellent                                            | 13% | 12% | -1%  | 0.50  |
| Very good                                            | 25% | 23% | -2%  | 0.25  |
| Good                                                 | 33% | 33% | 0%   | 0.85  |
| Fair                                                 | 22% | 23% | 1%   | 0.34  |
| Poor                                                 | 7%  | 9%  | 1%   | 0.11  |
| Mental Health                                        |     |     |      |       |
| Excellent                                            | 27% | 25% | -2%  | 0.15  |
| Very good                                            | 33% | 32% | -1%  | 0.47  |
| Good                                                 | 27% | 28% | 1%   | 0.41  |
| Fair                                                 | 12% | 13% | 1%   | 0.42  |
| Poor                                                 | 2%  | 3%  | 1%   | 0.02  |
| Race/Ethnicity                                       |     |     |      |       |
| American Indian/Alaska Native                        | 1%  | 0%  | 0%   | 0.21  |
| Asian American & Native Hawaiian or Pacific Islander | 6%  | 8%  | 1%   | 0.11  |
| Black                                                | 11% | 13% | 3%   | 0.005 |
| Hispanic                                             | 17% | 18% | 2%   | 0.09  |
| Multiracial                                          | 2%  | 3%  | 0%   | 0.56  |
| White                                                | 60% | 49% | -11% | 0.000 |
| Unknown                                              | 3%  | 8%  | 5%   | 0.000 |
| Hospital Census Division                             |     |     |      |       |
| New England                                          | 3%  | 3%  | 0%   | 0.63  |
| Pacific                                              | 26% | 24% | -2%  | 0.10  |

|                    |     |     |     |       |
|--------------------|-----|-----|-----|-------|
| East North Central | 12% | 10% | -2% | 0.04  |
| East South Central | 11% | 11% | 0%  | 0.98  |
| Mid-Atlantic       | 8%  | 11% | 3%  | 0.001 |
| Mountain           | 10% | 9%  | 0%  | 0.66  |
| South Atlantic     | 16% | 17% | 1%  | 0.37  |
| West North Central | 5%  | 5%  | -1% | 0.40  |
| West South Central | 9%  | 10% | 1%  | 0.17  |
| Hospital Bed Size  |     |     |     |       |
| <100               | 2%  | 1%  | -1% | 0.10  |
| 100-199            | 6%  | 5%  | -1% | 0.26  |
| 200+               | 93% | 94% | 1%  | 0.07  |
| Hospital Ownership |     |     |     |       |
| For-profit         | 23% | 25% | 2%  | 0.16  |
| Teaching Hospital  | 70% | 71% | 2%  | 0.21  |
| Rural Hospital     | 2%  | 1%  | -1% | 0.03  |

P-values are estimated using logistic regression.
