# Supplementary material for: Survey Protocols, Response Rates, and Representation of Underserved Patients: A Randomized Clinical Trial
Source: PubMed Central journal article supplement (PMC10799262; doi:10.1001/jamahealthforum.2023.4929), 2024-01-19
Supplement: jamahealthforum-e234929-s002.pdf [file jamahealthforum-e234929-s002.pdf]

## Data Sharing Statement

Elliott. Survey Protocols, Response Rates, and Representation of Underserved Patients. *JAMA Health Forum*. Published January 19, 2024. doi:10.1001/jamahealthforum.2023.4929

### Data

**Data available:** No

### Additional Information

**Explanation for why data not available:** Data cannot be shared publicly because it is proprietary, institutional data. Data are available from the Centers for Medicare and Medicaid Services for researchers who meet the criteria for access to confidential data.
